# Supplementary material for: Improvement of Symptoms and Cardiac Magnetic Resonance Abnormalities in Patients with Post-Acute Sequelae of SARS-CoV-2 Cardiovascular Syndrome (PASC-CVS) after Guideline-Oriented Therapy
Source: MDPI journal article supplement (doi:10.3390/biomedicines11123312), 2023-12-14
Supplement: s1 [file s1]

# Improvement of Symptoms and Cardiac Magnetic Resonance Abnormalities in Patients with Post-Acute Sequelae of SARS-CoV-2 Cardiovascular Syndrome (PASC-CVS) after Guideline-Oriented Therapy

Mariann Gyöngyösi <sup>1,\*</sup>, Ena Hasimbegovic <sup>1</sup>, Emilie Han <sup>1</sup>, Katrin Zlabinger <sup>1</sup>, Andreas Spannbaauer <sup>1</sup>, Martin Riesenhuber <sup>1</sup>, Kevin Hamzaraj <sup>1</sup>, Jutta Bergler-Klein <sup>1</sup>, Christian Hengstenberg <sup>1</sup>, Andreas Kammerlander <sup>1</sup>, Stefan Kastl <sup>1</sup>, Christian Loewe <sup>2</sup> and Dietrich Beitzke <sup>2</sup>

Supplementary Table S1. Detailed CMR data in the patients with/without CMR abnormalities and the data of the CMR phenotype groups.

|                                                         | Cardiac abnormalities |            | Subtypes n and percentages of the CMR abnormalities within groups |                                                    |            |
|---------------------------------------------------------|-----------------------|------------|-------------------------------------------------------------------|----------------------------------------------------|------------|
|                                                         | No                    | Yes        | Isolated pericardial effusion                                     | Functional and/or morphological cardiac impairment | Combined   |
|                                                         | n=123                 | n=155      | 34 (21.9%)                                                        | 79 (51.0%)                                         | 42 (27.1%) |
| Age (years)                                             | 44±14                 | 43±12      | 48±12 +                                                           | 42±11                                              | 42±14      |
| Female gender                                           | 99 (80.5%)            | 97 (62.6%) | 27 (79.4%)                                                        | 41 (51.9%)                                         | 29 (69.0%) |
| Pericardial effusion (w/wo functional impairment) n (%) | 0                     | 72 (46.5%) | 34 (100%)                                                         | 0                                                  | 38 (90.5%) |
| Reduced LVF n (%)                                       | 0                     | 39 (25.2%) | 0                                                                 | 22 (27.8%)                                         | 17 (40.5%) |
| Reduced RVF n (%)                                       | 0                     | 55 (35.5%) | 0                                                                 | 37 (46.8%)                                         | 18 (42.9%) |
| Biventricular enlargement n (%)                         | 0                     | 21 (13.5%) | 0                                                                 | 14 (17.7%)                                         | 7 (16.7%)  |
| Isolated LV enlargement n (%)                           | 0                     | 56 (36.1%) | 0                                                                 | 38 (48.1%)                                         | 18 (42.9%) |
| Isolated RV enlargement n (%)                           | 0                     | 47 (30.3%) | 0                                                                 | 33 (41.8%)                                         | 14 (33.3%) |
| Myocardial edema n (%)                                  | 0                     | 9 (5.8%)   | 0                                                                 | 5 (6.3%)                                           | 4 (9.5%)   |
| T1 increase n (%)                                       | 0                     | 5 (3.2%)   | 0                                                                 | 4 (5.1%)                                           | 1 (2.4%)   |
| Non-ischemic late gadolinium enhancement n (%)          | 0                     | 35 (22.6%) | 0                                                                 | 17 (21.5%)                                         | 18 (42.9%) |
| Pleural effusion n (%)                                  | 3 (2.4%)              | 13 (8.4%)* | 5 (14.7%)                                                         | 3 (3.8%)                                           | 5 (11.9%)  |
| Pericardial effusion (mL)                               | 0                     | 4.6±3.2*   | 4.2±2.3                                                           | 0                                                  | 5.1±3.8    |
| CMR LV EF (%)                                           | 60±5 %                | 58±7*      | 64±7                                                              | 57±6                                               | 54±7       |
| CMR LV EDV (mL)                                         | 128±25                | 152±40*    | 125±24                                                            | 162±43                                             | 153±35     |
| CMR LV ESV (mL)                                         | 52±14                 | 65±22*     | 47±15                                                             | 71±22                                              | 69±18      |
| CMR RV EF (%)                                           | 58±5                  | 53±6*      | 58±5                                                              | 51±5                                               | 51±7       |

|                 |        |         |        |        |        |
|-----------------|--------|---------|--------|--------|--------|
| CMR RV EDV (mL) | 133±24 | 164±42* | 131±27 | 173±44 | 168±37 |
| CMR RV ESV (mL) | 56±13  | 80±26*  | 56±13  | 87±24  | 82±27  |

Abbreviations: LV, left ventricular; RV, right ventricular; LVF, left ventricular function; RVF, right ventricular function; EF, ejection fraction; EDV, end-diastolic volume; ESV, end-systolic volume.

\*p<0.01 between patient groups with/without CMR abnormalities. Parameter with zero value in one group was not included into the statistics.

+p<0.05 between the subgroups
